# Supplementary material for: Evaluating the clinical use and safety of LumenEye in an outpatient colorectal clinic: a single-centre retrospective cohort study
Source: Research Square preprint supplement (doi:10.21203/rs.3.rs-7496093/v1), 2025-09-11
Supplement: Supplementary file 1 [file 9e3999ed3a77005e0e850143.docx]

**Supplementary materials**

*Supplementary figure 1*

*Supplementary figure* 1 – Origin of referral to LumenEye clinic (Overall cohort)

*Supplementary figure 2*

*Supplementary figure* 2 - Reason for referral to LumenEye clinic (Overall cohort)

*Supplementary figure 3*

*Supplementary figure* 3 – Next steps for patients undergoing LumenEye
